# Supplementary material
Source: publisher figshare collection journal article supplement (https://tandf.figshare.com/ndownloader/files/26790213)
Supplement: Supplementary file 1 [file 26790213]

Supplementary Table 4. Percentage of women taking different medications in classes with prevalence of 5% or higher overall and by each study visit

|  |  | **Overall** | | **Visit 0** | | **Visit 1** | | **Visit 2** | | **Visit 3** | | **Visit 4** | | **Visit 5** | |
| --- | --- | --- | --- | --- | --- | --- | --- | --- | --- | --- | --- | --- | --- | --- | --- |
|  | **All women** | **Obese** | **Non-obese** | **Obese** | **Non-obese** | **Obese** | **Non-obese** | **Obese** | **Non-obese** | **Obese** | **Non-obese** | **Obese** | **Non-obese** | **Obese** | **Non-obese** |
|  | 2186 | 436 | 1750 | 436 | 1750 | 421 | 1705 | 411 | 1677 | 398 | 1655 | 374 | 1548 | 200 | 824 |
| **Median Gestational Week** |  |  |  | 13 | | 20 | | 27 | | 32 | | 36 | | 39 | |
| **Medication classes** | | | | | | | | | | | | | | | |
| **Antihistamine, %(n)** | | | | | | | | | | | | | | | |
| Benadryl | 6.82 (149) | 6.19 (27) | 6.97 (122) | 2.98 (13) | 2.06 (36) | 1.66 (7) | 2.17 (37) | 2.19 (9) | 1.85 (31) | 2.26 (9) | 1.81 (30) | 2.14 (8) | 2.33 (36) | 1.0 (2) | 1.70(14) |
| Claritin | 3.39 (74) | 4.36 (19) | 3.14 (55) | 1.15 (5) | 0.91 (16) | 1.90 (8) | 1.35 (23) | 1.22 (5) | 0.89 (15) | 1.51 (6) | 1.15 (19) | 1.29 (20) | 0.80 (3) | 0.5 (1) | 0.97 (8) |
| Phenergan | 3.39 (74) | 5.05 (22) | 2.97 (52) | 2.75 (12) | 1.83 (32) | 1.66 (7) | 0.70 (12) | 1.22 (5) | 0.72 (12) | 0.75 (3) | 0.48 (8) | 0.53 (2) | 0.26 (4) | 0 | 0.73 (6) |
| Zyrtec | 2.52 (55) | 3.67 (16) | 2.23 (39) | 2.29 (10) | 0.91 (16) | 2.38 (10) | 1.17 (20) | 1.70 (7) | 0.83 (14) | 2.01 (8) | 1.03 (17) | 1.34 (5) | 0.97 (15) | 2.0 (4) | 0.73 (6) |
| Unisom | 1.10 (24) | 0.92 (4) | 1.14 (20) | 0.46 (2) | 0.74 (13) | 0.24 (1) | 0.35 (6) | 0 | 0.36 (6) | 0.25 (1) | 0.30 (5) | 0 | 0.26 (4) | 0 | 0.36 (3) |
| Cold + Allergy | 2.69 (59) | 2.53 (11) | 2.75 (48) | 0.46 (2) | 0.63 (11) | 0.71 (3) | 0.76 (13) | 1.46 (6) | 0.48 (8) | 1.01 (4) | 0.85 (14) | 1.34 (5) | 0.78 (12) | 0.5 (1) | 0.85 (7) |
| Decongestants + Allergy | 0.64 (14) | 0.69 (3) | 0.63 (11) | 0.23 (1) | 0.29 (5) | 0.24 (1) | 0.29 (5) | 0.24 (1) | 0.18 (3) | 0 | 0.18 (3) | 0.27 (1) | 0.19 (3) | 0 | 0.12 (1) |
| Allergy drops | 0.41 (9) | 0.46 (2) | 0.40 (7) | 0.23 (1) | 0.11 (2) | 0.48 (2) | 0.12 (2) | 0.24 (1) | 0.12 (2) | 0 | 0.06 (1) | 0 | 0.06 (1) | 0 | 0.12 (1) |
| Promethazine | 0.27 (6) | 0.23 (1) | 0.29 (5) | 0 | 0.23 (4) | 0.24 (1) | 0.06 (1) | 0.24 (1) | 0 | 0 | 0 | 0 | 0.06 (1) | 0 | 0 |
| Allegra | 0.18 (4) | 0.23 (1) | 0.17 (3) | 0.23 (1) | 0.11 (2) | 0 | 0 | 0 | 0 | 0 | 0.06 (1) | 0 | 0 | 0 | 0 |
| Atarax | 0.09 (2) | 0 | 0.11 (2) | 0 | 0.11 (2) | 0 | 0.06 (1) | 0 | 0 | 0 | 0 | 0 | 0 | 0 | 0 |
| Antihistamine (NOS) | 0.09 (2) | 0 | 0.11 (2) | 0 | 0.11 (2) | 0 | 0 | 0 | 0 | 0 | 0 | 0 | 0 | 0 | 0 |
| Hydroxyzine Pamoate | 0.27 (6) | 0.46 (2) | 0.23 (4) | 0.46 (2) | 0.06 (1) | 0 | 0.12 (2) | 0 | 0 | 0 | 0.06 (1) | 0 | 0.06 (1) | 0 | 0 |
| Meclizine | 0.14 (3) | 0.23 (1) | 0.11 (2) | 0 | 0.06 (1) | 0 | 0 | 0.24 (1) | 0 | 0 | 0 | 0 | 0.06 (1) | 0 | 0 |
| Dramamine | 0.09 (2) | 0.23 (1) | 0.06 (1) | 0.23 (1) | 0.06 (1) | 0 | 0 | 0 | 0 | 0 | 0 | 0 | 0 | 0 | 0 |
| Chlorpheniramine | 0.09 (2) | 0.46 (2) | 0 | 0.46 (2) | 0 | 0 | 0 | 0 | 0 | 0 | 0 | 0 | 0 | 0 | 0 |
| Xyzal | 0.05 (1) | 0.23 (1) | 0 | 0.23 (1) | 0 | 0 | 0 | 0 | 0 | 0 | 0 | 0 | 0 | 0 | 0 |
| Theraflu | 0.05 (1) | 0.23 (1) | 0 | 0 | 0 | 0.24 (1) | 0 | 0 | 0 | 0 | 0 | 0 | 0 | 0 | 0 |
| **Anti-infective Agents, % (n)** | | | | | | | | | | | | | | | |
| Antibiotics (NOS) | 5.40 (118) | 3.21 (14) | 5.94 (104) | 0.69 (3) | 2.11 (37) | 0.48 (2) | 1.41 (24) | 1.22 (5) | 0.31 (22) | 0.75 (3) | 1.39 (23) | 0.53 (2) | 1.16 (18) | 0.50 (1) | 0.97 (8) |
| Azithromycin | 4.03 (88) | 5.73 (25) | 3.60 (63) | 1.15 (5) | 1.03 (18) | 0.95 (4) | 1.29 (22) | 1.95 (8) | 0.12 (2) | 0.75 (3) | 0.48 (8) | 1.34 (5) | 0.78 (12) | 0.50 (1) | 0.61 (5) |
| Amoxicillin | 3.48 (76) | 3.44 (15) | 3.49 (61) | 0.92 (4) | 1.37 (24) | 1.90 (8) | 0.76 (13) | 0.73 (3) | 0.66 (11) | 0.25 (1) | 0.24 (4) | 0.27 (1) | 0.65 (10) | 0 | 0.36 (3) |
| Macrobid | 3.44 (75) | 4.14 (18) | 3.25 (57) | 2.06 (9) | 1.09 (19) | 0.95 (4) | 0.76 (13) | 0.49 (2) | 1.13 (19) | 0.75 (3) | 0.73 (12) | 0.53 (2) | 0.78 (12) | 1.0 (2) | 0.73 (6) |
| Flagyl | 1.97 (43) | 2.06 (9) | 1.94 (34) | 0.92 (4) | 0.80 (14) | 0.48 (2) | 0.65 (11) | 0.49 (2) | 0.30 (5) | 0.25 (1) | 0.30 (5) | 0 | 0.13 (2) | 0 | 0.12 (1) |
| Antiviral medication | 1.74 (38) | 2.06 (9) | 1.66 (29) | 0.46 (2) | 0.34 (6) | 0 | 0.35 (6) | 0.48 (2) | 0.36 (6) | 0.75 (3) | 0.54 (9) | 0.80 (3) | 1.10 (17) | 2.0 (4) | 1.82 (15) |
| Cephalaxin | 1.51 (33) | 1.15 (5) | 1.60 (28) | 0.69 (3) | 0.34 (6) | 0 | 0.29 (5) | 0 | 0.60 (10) | 0.25 (1) | 0.24 (4) | 0.27 (1) | 0.39 (6) | 0 | 0 |
| Ampicillin | 0.69 (15) | 0.92 (4) | 0.63 (11) | 0.46 (2) | 0.29 (5) | 0.48 (2) | 0.12 (2) | 0 | 0.18 (3) | 0.25 (1) | 0.18 (3) | 0 | 0.13 (2) | 0 | 0 |
| Penicillin (NOS) | 0.82 (18) | 0.92 (4) | 0.80 (14) | 0.46 (2) | 0.23 (4) | 0 | 0.18 (3) | 0.24 (1) | 0.12 (2) | 0 | 0.18 (3) | 0.27 (1) | 0.13 (2) | 0 | 0.12 (1) |
| Rocephine | 0.37 (8) | 0.23 (1) | 0.40 (7) | 0 | 0.23 (4) | 0 | 0.12 (2) | 0 | 0 | 0.25 (1) | 0.06 (1) | 0 | 0 | 0 | 0.12 (1) |
| Bactrim | 0.73 (16) | 0.92 (4) | 0.69 (12) | 0 | 0.17 (3) | 0.48 (2) | 0.06 (1) | 0.24 (1) | 0.18 (3) | 0.50 (2) | 0.30 (5) | 0 | 0.06 (1) | 0 | 0 |
| Chloraseptic liquid | 0.32 (7) | 0.46 (2) | 0.29 (5) | 0.23 (1) | 0.17 (3) | 0.24 (1) | 0.06 (1) | 0 | 0 | 0 | 0.06 (1) | 0 | 0 | 0 | 0 |
| KLARON 10% Lotion | 0.05 (1) | 0 | 0.06 (1) | 0 | 0.06 (1) | 0 | 0 | 0 | 0 | 0 | 0 | 0 | 0 | 0 | 0 |
| Clindamycin | 0.41 (9) | 0.46 (2) | 0.40 (7) | 0 | 0.06 (1) | 0 | 0.29 (5) | 0.24 (1) | 0.06 (1) | 0.25 (1) | 0.06 (1) | 0 | 0 | 0 | 0 |
| Antifungal medication | 1.19 (26) | 2.29 (10) | 0.91 (16) | 0.69 (3) | 0.06 (1) | 0.48 (2) | 0.06 (1) | 0.49 (2) | 0.42 (7) | 0.75 (3) | 0.18 (3) | 0.27 (1) | 0.13 (2) | 0 | 0.24 (2) |
| Erythromycin | 0.09 (2) | 0 | 0.11 (2) | 0 | 0 | 0 | 0 | 0 | 0.06 (1) | 0 | 0 | 0 | 0.06 (1) | 0 | 0 |
| Ceftin | 0.23 (5) | 0.23 (1) | 0.23 (4) | 0 | 0 | 0 | 0.12 (2) | 0 | 0 | 0 | 0.06 (1) | 0.27 (1) | 0.06 (1) | 0 | 0.12 (1) |
| Cefdirin | 0.05 (1) | 0.23 (1) | 0 | 0.23 (1) | 0 | 0 | 0 | 0 | 0 | 0 | 0 | 0 | 0 | 0 | 0 |
| Malaria drug (NOS) | 0.05 (1) | 0 | 0.06 (1) | 0 | 0 | 0 | 0 | 0 | 0.06 (1) | 0 | 0 | 0 | 0 | 0 | 0 |
| **Central Nervous System Agents, % (n)** | | | | | | | | | | | | | | | |
| Tylenol | 42.41 (927) | 45.64 (199) | 41.60 (728) | 24.08 (105) | 21.09 (369) | 23.28 (98) | 23.23 (379) | 16.3 (67) | 16.4 (275) | 18.59 (74) | 13.23 (219) | 13.64 (51) | 12.08 (187) | 12.50 (25) | 8.13 (67) |
| Other acetaminophen | 3.89 (85) | 2.52 (11) | 4.23 (74) | 0.46 (2) | 0.91 (16) | 0.71 (3) | 1.17 (20) | 1.46 (6) | 0.78 (13) | 1.01 (4) | 1.03 (17) | 0.26 (5) | 0.84 (13) | 0.5 (1) | 0.85 (7) |
| NSAID | 2.93 (64) | 3.44 (15) | 2.80 (49) | 2.29 (10) | 1.60 (28) | 0.95 (4) | 0.94 (16) | 1.22 (5) | 0.83 (14) | 0.50 (2) | 0.24 (4) | 0.53 (2) | 0.52 (8) | 0.5 (1) | 0.36 (3) |
| Mood disorders | 1.38 (30) | 2.52 (11) | 1.09 (19) | 0.69 (3) | 0.17 (3) | 0.24 (1) | 0.18 (3) | 1.70 (7) | 0.30 (5) | 1.26 (5) | 0.36 (6) | 1.07 (4) | 0.58 (9) | 1.5 (3) | 0.73 (6) |
| Acetaminophen/Butalbital | 1.28 (28) | 2.06 (9) | 1.09 (19) | 0.23 (1) | 0.17 (3) | 0.71 (3) | 0.53 (9) | 0.73 (3) | 0.42 (7) | 0.50 (2) | 0.30 (5) | 0.80 (3) | 0.19 (3) | 0 | 0.36 (3) |
| Acetaminophen/Oxycodone | 0.78 (17) | 0.46 (2) | 0.86 (15) | 0 | 0.23 (4) | 0 | 0.23 (4) | 0.24 (1) | 0.36 (6) | 0 | 0.12 (2) | 0 | 0.26 (4) | 0.5 (1) | 0 |
| Acetaminophen/Codeine | 0.92 (20) | 0.23 (1) | 1.09 (19) | 0 | 0.11 (2) | 0 | 0.59 (10) | 0 | 0.12 (2) | 0.25 (1) | 0.18 (3) | 0 | 0.13 (2) | 0 | 0.36 (3) |
| Narcotics | 0.46 (10) | 0.23 (1) | 0.51 (9) | 0 | 0.11 (2) | 0.24 (1) | 0.23 (4) | 0 | 0.12 (2) | 0 | 0.12 (2) | 0 | 0.26 (4) | 0 | 0 |
| Compazine | 0.23 (5) | 0 | 0.29 (5) | 0 | 0.06 (1) | 0 | 0.06 (1) | 0 | 0 | 0 | 0.18 (3) | 0 | 0.06 (1) | 0 | 0.12 (1) |
| Adderall | 0.09 (2) | 0 | 0.11 (2) | 0 | 011 (2) | 0 | 0 | 0 | 0 | 0 | 0 | 0 | 0 | 0 | 0 |
| Excedrin extra strength | 0.23 (5) | 0.46 (2) | 0.17 (3) | 0.23 (1) | 0.06 (1) | 0.24 (1) | 0 | 0 | 0.06 (1) | 0 | 0.06 (1) | 0 | 0.06 (1) | 0 | 0 |
| Sumatriptan | 0.05 (1) | 0.23 (1) | 0 | 0 | 0 | 0 | 0 | 0.24 (1) | 0 | 0.25 (1) | 0 | 0.27 (1) | 0 | 0 | 0 |
| Alka-Seltzer | 0.05 (1) | 0 | 0.06 (1) | 0 | 0.06 (1) | 0 | 0 | 0 | 0 | 0 | 0 | 0 | 0 | 0 | 0 |
| Pain Medication (NOS) | 0 |  |  | 0 | 0 | 0 | 0 | 0 | 0 | 0 | 0 | 0 | 0 | 0 | 0 |
| Hydrocodone/Paracetamol | 0.78 (17) | 1.15 (5) | 0.69 (12) | 0.23 (1) | 0 | 0.48 (2) | 0.12 (2) | 0.24 (1) | 0.30 (5) | 0.25 (1) | 0.12 (2) | 0 | 0.13 (2) | 0 | 0.24 (2) |
| Topamax | 0.05 (1) | 0 | 0.06 (1) | 0 | 0 | 0 | 0.06 (1) | 0 | 0.06 (1) | 0 | 0 | 0 | 0 | 0 | 0 |
| Neurontin | 0.05 (1) | 0.23 (1) | 0 | 0.23 (1) | 0 | 0 | 0 | 0 | 0 | 0 | 0 | 0 | 0 | 0 | 0 |
| Ambien | 0.78 (17) | 0.23 (1) | 0.91 (16) | 0 | 0 | 0 | 0.06 (1) | 0.24 (1) | 0.06 (1) | 0 | 0.48 (8) | 0 | 0.45 (7) | 0 | 0.73 (6) |
| Aspirin free Excedrin | 0.64 (14) | 1.15 (5) | 0.51 (9) | 0.46 (2) | 0.11 (2) | 0.71 (3) | 0.35 (6) | 0.49 (2) | 0.12 (2) | 0.25 (1) | 0.12 (2) | 0.27 (1) | 0.06 (1) | 0 | 0 |
| Theraflu | 0.05 (1) | 0.23 (1) | 0 | 0 | 0 | 0.24 (1) | 0 | 0 | 0 | 0 | 0 | 0 | 0 | 0 | 0 |
| Caffeine | 0.09 (2) | 0.23 (1) | 0.06 (1) | 0 | 0 | 0.24 (1) | 0 | 0 | 0.06 (1) | 0 | 0 | 0.27 (1) | 0 | 0 | 0 |
| **Gastrointestinal Drugs, % (n)** | | | | | | | | | | | | | | | |
| Antacids | 29 (634) | 31.89 (139) | 28.29 (495) | 8.72 (38) | 6.69 (117) | 13.54 (57) | 8.51 (145) | 18.01 (74) | 12.64 (212) | 19.35 (77) | 15.77 (261) | 21.93 (82) | 17.83 (276) | 23.5 (47) | 16.99 (140) |
| Anti-constipation | 11.03 (241) | 7.34 (32) | 11.95 (209) | 1.38 (6) | 4.11 (72) | 3.8 (16) | 4.75 (81) | 2.64 (11) | 4.83 (83) | 3.27 (13) | 5.98 (99) | 4.01 (15 | 5.49 (85) | 4.50 (9) | 6.43 (53) |
| Antiemetic | 7.60 (166) | 7.57 (33) | 7.60 (133) | 4.59 (20) | 5.49 (96) | 3.33 (14) | 2.99 (51) | 2.43 (10) | 0.89 (15) | 1.76 (7) | 1.15 (19) | 1.34 (5) | 0.78 (12) | 1.0 (2) | 0.36 (3) |
| Antidiarrhea | 0.59 (13) | 0.46 (2) | 0.63 (11) | 0 | 0.06 (1) | 0 | 0.12 (2) | 0.24 (1) | 0.06 (1) | 0.25 (1) | 0.12 (2) | 0 | 0.39 (6) | 0 | 0.12 (1) |
| Gas-Ex | 1.05 (23) | 1.15 (5) | 1.03 (18) | 0.23 (1) | 0.29 (5) | 0.24 (1) | 0.35 (6) | 0.24 (1) | 0.42 (7) | 0.5 (2) | 0.48 (8) | 0 | 0.32 (5) | 0 | 0.24 (2) |
| Milk of Magnesia | 0.37 (8) | 0.23 (1) | 0.40 (7) | 0.23 (1) | 0.29 (5) | 0 | 0.18 (3) | 0 | 0.18 (3) | 0 | 0.18 (3) | 0 | 0.13 (2) | 0 | 0 |
| Lactaid tablets | 0.23 (5) | 0 | 0.29 (5) | 0 | 0.23 (4) | 0 | 0.12 (2) | 0 | 0 | 0 | 0.12 (2) | 0 | 0.13 (2) | 0 | 0.12 (1) |
| Enzyme (NOS) | 0.05 (1) | 0 | 0.06 (1) | 0 | 0.06 (1) | 0 | 0 | 0 | 0 | 0 | 0 | 0 | 0 | 0 | 0 |
| Digestive enzymes (NOS) | 0.09 (2) | 0 | 011 (2) | 0 | 0.06 (1) | 0 | 0.06 (1) | 0 | 0 | 0 | 0 | 0 | 0 | 0 | 0 |
| Magnesium sulfate | 0.23 (5) | 0 | 0.29 (5) | 0 | 0 | 0 | 0.06 (1) | 0 | 0.06 (1) | 0 | 0.12 (2) | 0 | 0.06 (1) | 0 | 0 |
| Aleovera | 0.09 (2) | 0.46 (2) | 0 | 0 | 0 | 0.24 (1) | 0 | 0.24 (1) | 0 | 0 | 0 | 0 | 0 | 0 | 0 |
| Actigall | 0.05 (1) | 0 | 0.06 (1) | 0 | 0 | 0 | 0 | 0 | 0 | 0 | 0.06 (1) | 0 | 0 | 0 | 0 |
| Betaine HCL | 0.05 (1) | 0 | 0.06 (1) | 0 | 0 | 0 | 0 | 0 | 0.06 (1) | 0 | 0 | 0 | 0 | 0 | 0 |
| Papaya Enzyme | 0.09 (2) | 0 | 0.11 (2) | 0 | 0 | 0 | 0 | 0 | 0.06 (1) | 0 | 0 | 0 | 0.06 (1) | 0 | 0 |
| Colon cleanse | 0.05 (1) | 0 | 0.06 (1) | 0 | 0 | 0 | 0 | 0 | 0 | 0 | 0 | 0 | 0.06 (1) | 0 | 0 |
| Canasa rectal suppository | 0.14 (3) | 0.23 (1) | 0.11 (2) | 0.23 (1) | 0 | 0 | 0.06 (1) | 0 | 0.06 (1) | 0 | 0.12 (2) | 0 | 0.13 (2) | 0 | 0.12 (1) |
| **Hormones & Synthetic Substitutes, % (n)** | | | | | | | | | | | | | | | |
| Diabetes | 1.01 (22) | 2.29 (10) | 0.69 (12) | 0 | 0 | 0.24 (1) | 0.06 (1) | 0.97 (4) | 0.06 (1) | 2.01 (8) | 0.42 (7) | 1.61 (6) | 0.58 (9) | 2.5 (5) | 0.36 (3) |
| Steroids | 3.43 (75) | 4.82 (21) | 3.09 (54) | 0.92 (4) | 0.63 (11) | 1.90 (8) | 0.56 (10) | 0.97 (4) | 0.78 (13) | 1.26 (5) | 1.15 (19) | 1.87 (7) | 0.96 (15) | 1.0 (2) | 0.85 (7) |
| Thyroid | 0.41 (9) | 0.92 (4) | 0.29 (5) | 0.46 (2) | 0.06 (1) | 0.23 (4) | 0.48 (2) | 0.97 (4) | 0.18 (3) | 0.75 (3) | 0.18 (3) | 0.8 (3) | 0.19 (3) | 0.5 (1) | 0 |
| Progesterone | 1.74 (38) | 3.44 (15) | 1.31 (23) | 1.61 (7) | 0.4 (7) | 1.19 (5) | 0.18 (3) | 1.46 (6) | 0.60 (10) | 1.51 (6) | 0.66 (11) | 0.06 (1) | 0.06 (1) | 0 | 0 |
| **Autonomic Drugs, % (n)** | | | | | | | | | | | | | | | |
| Decongestants + Allergy | 0.64 (14) | 0.69 (3) | 0.63 (11) | 0.23 (1) | 0.29 (5) | 0.24 (1) | 0.29 (5) | 0.24 (1) | 0.18 (3) | 0 | 0.18 (3) | 0.27 (1) | 0.19 (3) | 0 | 0.12 (1) |
| Decongestants + Cold | 1.29 (28) | 0.23 (1) | 1.55 (27) | 0 | 0.34 (6) | 0 | 0.53 (9) | 0 | 0.3 (5) | 0 | 0.42 (7) | 0.27 (1) | 0.13 (2) | 0 | 0.12 (1) |
| Sudafed PE | 0.09 (2) | 0.46 (2) | 0 | 0 | 0 | 0 | 0 | 0.24 (1) | 0 | 0 | 0 | 0.27 (1) | 0 | 0 | 0 |
| Bentyl | 0.05 (1) | 0 | 0.06 (1) | 0 | 0.06 (1) | 0 | 0.06 (1) | 0 | 0 | 0 | 0.06 (1) | 0 | 0.06 (1) | 0 | 0 |
| Flexeril | 0.91 (20) | 1.15 (5) | 0.86 (15) | 0.23 (1) | 0.06 (1) | 0 | 0.29 (5) | 0.24 (1) | 0.3 (5) | 0.5 (2) | 0.24 (4) | 0.53 (2) | 0.13 (2) | 1.0 (2) | 0.24 (2) |
| Epinephrine | 0.09 (2) | 0 | 0.11 (2) | 0 | 0.11 (2) | 0 | 0 | 0 | 0.06 (1) | 0 | 0 | 0 | 0 | 0 | 0 |
| Pseudoephedrine (Sudafed) | 4.62 (101) | 4.13 (18) | 4.74 (83) | 0.69 (3) | 0.91 (16) | 1.43 (6) | 1.41 (24) | 1.22 (5) | 1.37 (23) | 1.51 (6) | 1.39 (23) | 0.53 (2) | 1.36 (21) | 0.5 (1) | 0.85 (7) |
| Phenylephrine | 0.18 (4) | 0.23 (1) | 0.17 (3) | 0 | 0 | 0 | 0.06 (1) | 0 | 0.06 (1) | 0.25 (1) | 0.12 (2) | 0 | 0.13 (2) | 0 | 0 |
| Dopamine | 0.05 (1) | 0 | 0.06 (1) | 0 | 0 | 0 | 0.06 (1) | 0 | 0 | 0 | 0.06 (1) | 0 | 0.06 (1) | 0 | 0.12 (1) |
| Albuterol | 2.06 (45) | 3.21 (14) | 1.77 (31) | 0.92 (4) | 0.46 (8) | 0.95 (4) | 0.47 (8) | 0.97 (4) | 0.83 (14) | 0.75 (3) | 0.66 (11) | 1.07 (4) | 0.65 (10) | 0 | 0.24 (2) |
| Terbutaline | 0.27 (6) | 0 | 0.34 (6) | 0 | 0 | 0 | 0.06 (1) | 0 | 0 | 0 | 0.12 (2) | 0 | 0.19 (3) | 0 | 0 |
| Sleep aid | 0.05 (1) | 0 | 0.06 (1) | 0 | 0 | 0 | 0 | 0 | 0.06 (1) | 0 | 0 | 0 | 0 | 0 | 0 |
| Maxair | 0.05 (1) | 0 | 0.06 (1) | 0 | 0.06 (1) | 0 | 0.06 (1) | 0 | 0 | 0 | 0 | 0 | 0 | 0 | 0 |
| Combivent | 0.05 (1) | 0.23 (1) | 0 | 0 | 0 | 0 | 0 | 0.24 (1) | 0 | 0 | 0 | 0 | 0 | 0 | 0 |
| Advair | 0.18 (4) | 0.69 (3) | 0.06 (1) | 0.23 (1) | 0 | 0.24 (1) | 0 | 0 | 0 | 0 | 0.06 (1) | 0.27 (1) | 0 | 0 | 0 |
| Mucinex D | 0.05 (1) | 0 | 0.06 (1) | 0 | 0 | 0 | 0.06 (1) | 0 | 0 | 0 | 0 | 0 | 0 | 0 | 0 |
| Symbicort | 0.05 (1) | 0 | 0.06 (1) | 0 | 0 | 0 | 0 | 0 | 0 | 0 | 0 | 0 | 0.06 (1) | 0 | 0.12 (1) |
| Decongestant (NOS) | 0.09 (2) | 0.46 (2) | 0 | 0 | 0 | 0.24 (1) | 0 | 0.24 (1) | 0 | 0 | 0 | 0 | 0 | 0 | 0 |
| Muscle Relaxant (NOS) | 0.09 (2) | 0.23 (1) | 0.06 (1) | 0 | 0 | 0 | 0 | 0 | 0 | 0 | 0.06 (1) | 0.27 (1) | 0 | 0 | 0 |
| **Respiratory Tract Agents, % (n)** | | | | | | | | | | | | | | | |
| Robitussin | 4.21 (92) | 4.59 (20) | 4.11 (72) | 1.38 (6) | 0.61 (16) | 1.43 (6) | 0.76 (13) | 1.22 (5) | 1.07 (18) | 0.25 (1) | 0.79 (13) | 1.07 (4) | 0.71 (11) | 1.5 (3) | 0.85 (7) |
| Other Robitussin | 1.01 (22) | 0.23 (1) | 1.20 (21) | 0 | 0.11 (2) | 0 | 0.47 (8) | 0 | 0.48 (8) | 0.25 (1) | 0.12 (2) | 0 | 0 | 0 | 0.24 (2) |
| Other expectorants | 1.28 (28) | 1.15 (5) | 1.31 (23) | 0 | 0.29 (5) | 0.24 (1) | 0.35 (6) | 0.49 (2) | 0.24 (4) | 0 | 0.24 (4) | 0.53 (2) | 0.26 (4) | 0 | 0.24 (2) |
| Singulair | 0.37 (8) | 0.92 (4) | 0.23 (4) | 0.46 (2) | 0 | 0.71 (3) | 0.12 (2) | 0.49 (2) | 0.24 (4) | 0.5 (2) | 0.18 (3) | 0.27 (1) | 0.06 (1) | 0 | 0 |

Abbreviations: HCL, hydrochloric acid; NOS, not otherwise specified; NSAID, Nonsteroidal anti-inflammatory drugs.

Notes: Cold + Allergy category includes Tylenol PM, Tylenol allergy sinus, Tylenol cold relief caplet, and Actifed cold & allergy.

Decongestant + Allergy category includes Zyrtec D, Claritin D, and Allegra D.

Antiviral medications category includes Acyclovir, Famcyclovir, valacyclovir, Tamiflu, Viread and unspecified antiviral medications.

Antifungal medications category includes Nystatin, Diflucan and unspecified antifungal medications.

Other acetaminophen category includes Midrin, Tylenol headache plus, Tylenol PM, Tylenol allergy complete multi-symptom, Tylenol cold relief caplet, Tylenol sinus sever congestion, Tylenol cold & flu, and Tylenol cold multi-symptom daytime.

NSAID category includes aspirin, Aleve, Advil, and Indocin.

Mood disorders category includes Elavil, Trazodone, Xanax, Prozac, Lamictal, Zoloft, Risperidone, Celexa, Escitalopram oxalate, Azilect, and unspecified anti-anxiety drugs.

Narcotics category includes Morphine, Dilaudid HCL, Fentanyl, Darvocet, and Tramadol.

Antacid category includes Pepto Bismol, Tums, Magnesium oxide, Mintox, Carafate, GAVISCON, Zantac, Mylanta, Alka-Seltzer, Pepcid, Prilosec, Rolaid, Prevacid, Nexium, Pepcid Complete, Kapidex, unspecified antacids, unspecified anti-reflux medications, unspecified heart burn medications, and GI cocktail.

Anti-constipation category includes Dulcolax, Senokot, Colace, Fibercon, Metamucil, Citrucel, Docusate, Miralax, Peri-colace, unspecified laxatives, unspecified stool softeners, and fiber.

Antiemetics category includes Dramamine, Zofran, Emetrol, Meclizine, unspecified nausea medication, and unspecified antiemetic medications.

Antidiarrhea category includes Lomotil, Imodium A-D, and unspecified diarrhea medication.

Diabetes category includes Metformin HCL, Glyburide, NovoLog, Insulin NOS, and Insulin (Human) Type NOS.

Steroids category includes Betamethasone, Hydrocortisone, Prednisone, Methylprednisolone (Solumedrol), Mycolog, Nasacort, Proctofoam HCL, clobetasol propionate, Westcort cream, Pulmicort, Lotrisone cream, Mycolog II, Flonase, Nasonex, Advair, Symbicort, Omnaris, Steroid NOS, Cortisone, and Corticosteroid injections (NOS).

Thyroid category includes Iodine, Thyroxine, Levothyroxine sodium, and Thyroid medication NOS.

Progesterone category includes progesterone/ Prometrium, 17P/ Delalutin, and vaginal progesterone injection.

Decongestants + cold category includes Tylenol Allergy Sinus, Tylenol Sinus Severe Congestion, Tylenol Cold and Flu Severe, and Tylenol Cold Multi-symptom Daytime.

Other Robitussin category includes Robitussin CF Cough and Cold, Tussin, Tussin DM, Robitussin DAC, and Robitussin DM Max;

Other expectorants category includes Guaifenesin with Codeine, Mucinex Cough Liquid for kids, Mucinex D, Tylenol Cold and Flu Severe, Broncolin Topical Cough Suppressant, Cough medication (NOS), Cough Syrup with Codeine (NOS), and Nyquil (NOS).
